# Supplementary material
Source: PubMed Central journal article supplement (PMC8072259)
Supplement: pnas.2023426118.sapp.pdf [file pnas.2023426118.sapp.pdf]

## Supplementary Information for

# A translational riboswitch coordinates nascent transcription-translation coupling

**Surajit Chatterjee<sup>a,1</sup>, Adrien Chauvier<sup>a,1</sup>, Shiba S. Dandpat<sup>a</sup>, Irina Artsimovitch<sup>b</sup>  
and Nils G. Walter<sup>a,2</sup>**

<sup>a</sup>Single Molecule Analysis Group, Department of Chemistry and Center for RNA Biomedicine, University of Michigan, Ann Arbor, MI 48109; and <sup>b</sup>Department of Microbiology, The Ohio State University, Columbus, OH 43210

<sup>1</sup>S.C. and A.C. contributed equally to this work.

<sup>2</sup>To whom correspondence may be addressed. Email: [nwalter@umich.edu](mailto:nwalter@umich.edu)

## SUPPLEMENTARY FIGURES

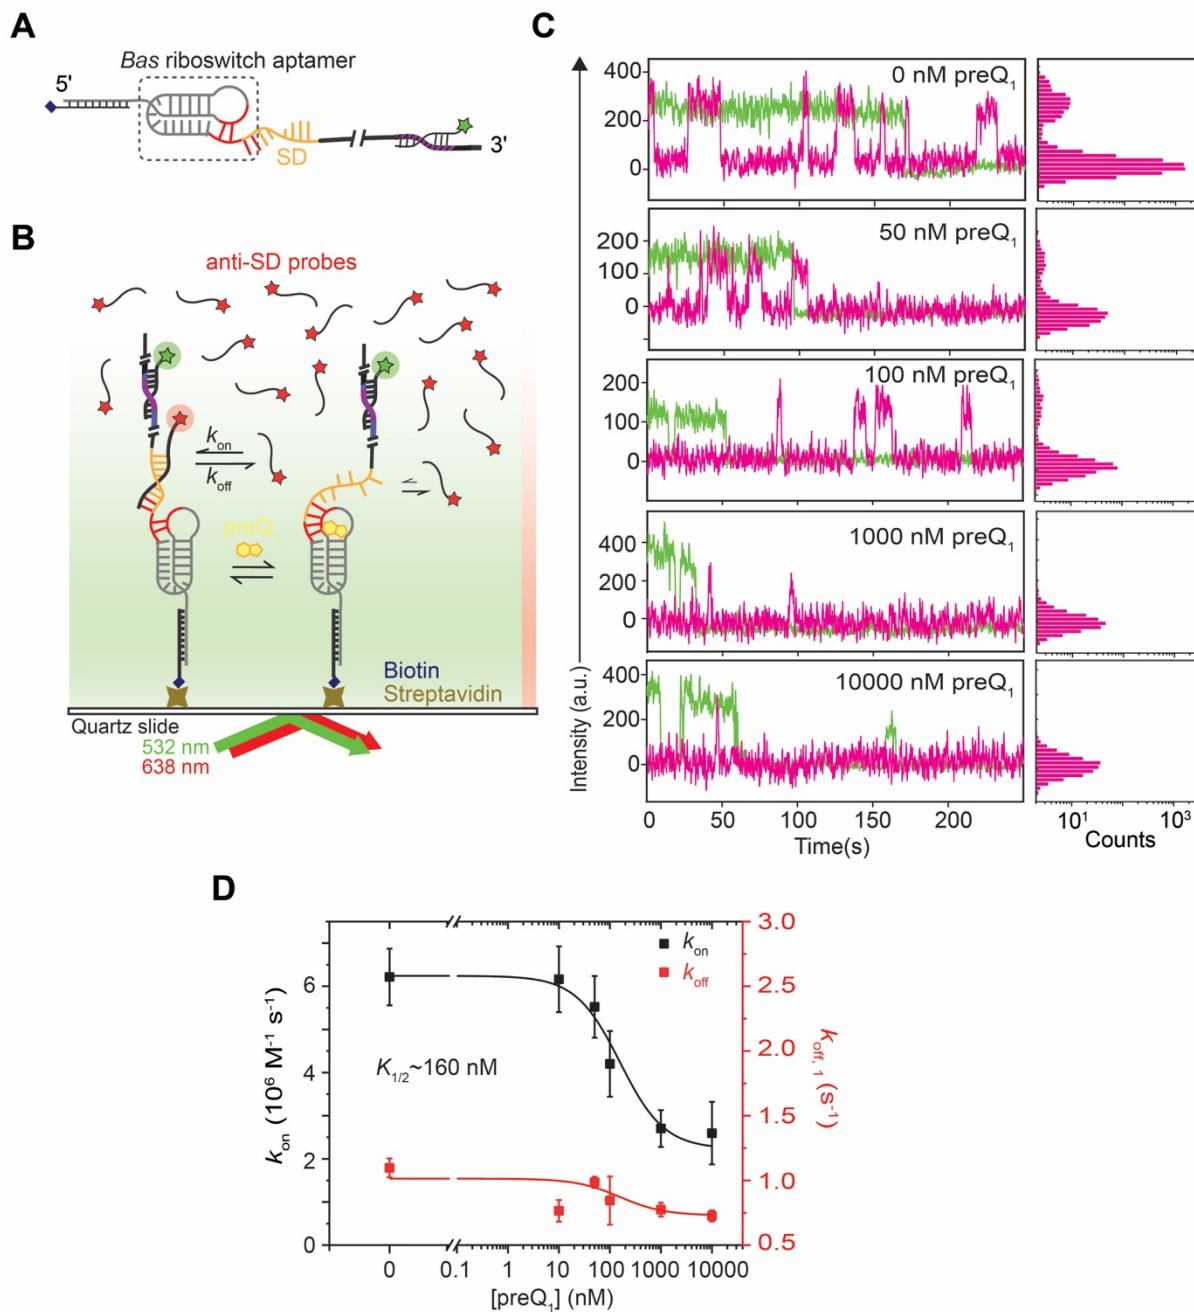

**Fig. S1. Single-molecule measurements of anti-SD probe binding kinetics to *Bas* mRNA as a function of preQ<sub>1</sub> concentration.** (A) The *Bas* mRNA complex used for monitoring anti-Shine-Dalgarno (anti-SD) probe binding to the SD. The full length mRNA was immobilized on the quartz slide via a biotinylated capture strand that was hybridized to the 5' end of the mRNA. A Cy3 labeled LNA was hybridized to the second

SD (purple) to locate the mRNA molecules on the slide surface. (B) Experimental set-up for monitoring binding of Cy5 labeled anti-SD probes to the surface-immobilized single mRNA molecules using TIRF microscopy. (C) Representative fluorescence versus intensity versus time traces showing repeated anti-SD probe binding (magenta spikes) to individual mRNA molecules (green) as a function of preQ<sub>1</sub> concentration. Cy5 intensity histogram corresponding to each trace are shown on the right-hand side. (D) Association ( $k_{\text{on}}$ ) and dissociation ( $k_{\text{off}}$ ) rates were calculated from exponential fits of the dwell times in the unbound and bound states, respectively. The half-saturation point ( $K_{1/2}$ ) value from the global saturation curve fit of the anti-SD probe is indicated. Values represent the average  $\pm$  standard error of the mean of at least three independent experiments.

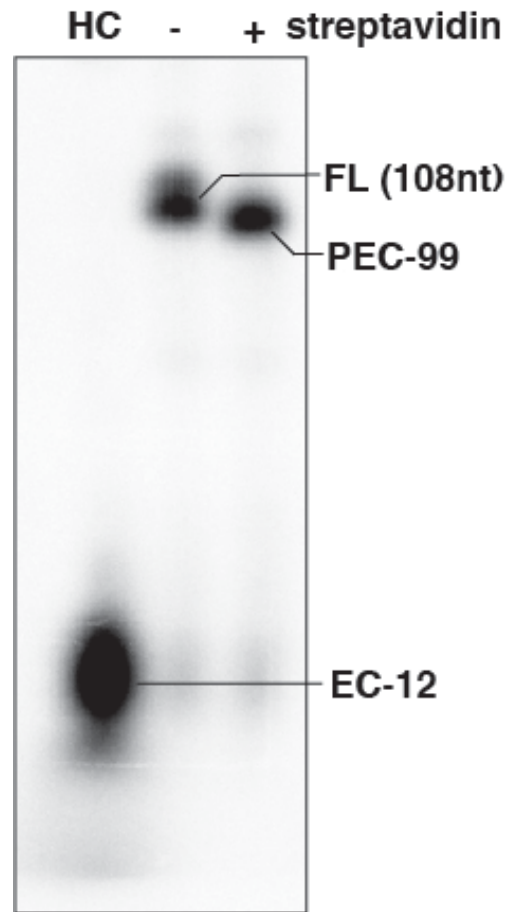

**Fig. S2. mRNA synthesis after rNTPs addition to the halted complex (HC).** RNAP resumes transcription from HC and transcribes 108 nt long RNA-only transcripts in the absence of streptavidin roadblock. In the presence of streptavidin, RNAP is stalled at the C99 position to form PEC-99.

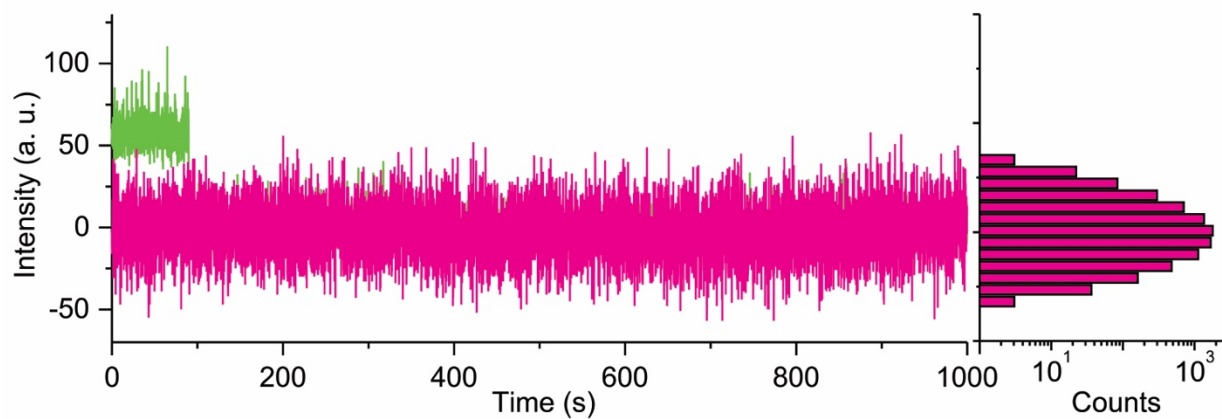

**Fig. S3. 30S binding to the surface immobilized halted complex.** Single-molecule trajectory representative of 99% of traces from a 30S binding measurement with the halted complex (HC), showing exceptionally rare binding events.

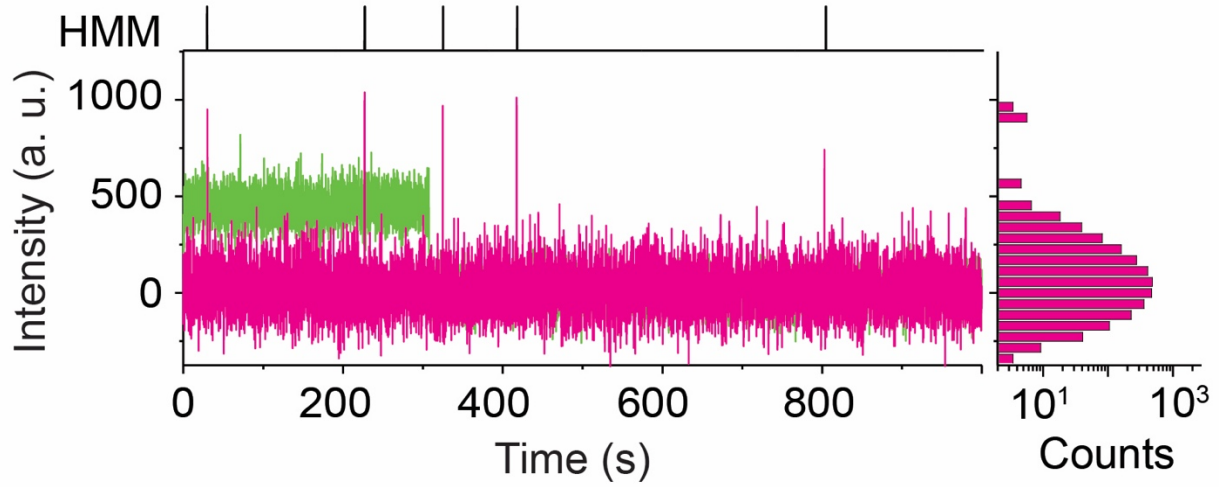

**Fig. S4. 30S binding to the PEC-99 is specific to the RBS region of the nascent mRNA.** Representative single-molecule trajectory as in Fig. 2C, but in the presence of a blocking strand that competes with the 30S for binding to the SD of the nascent mRNA in PEC-99.

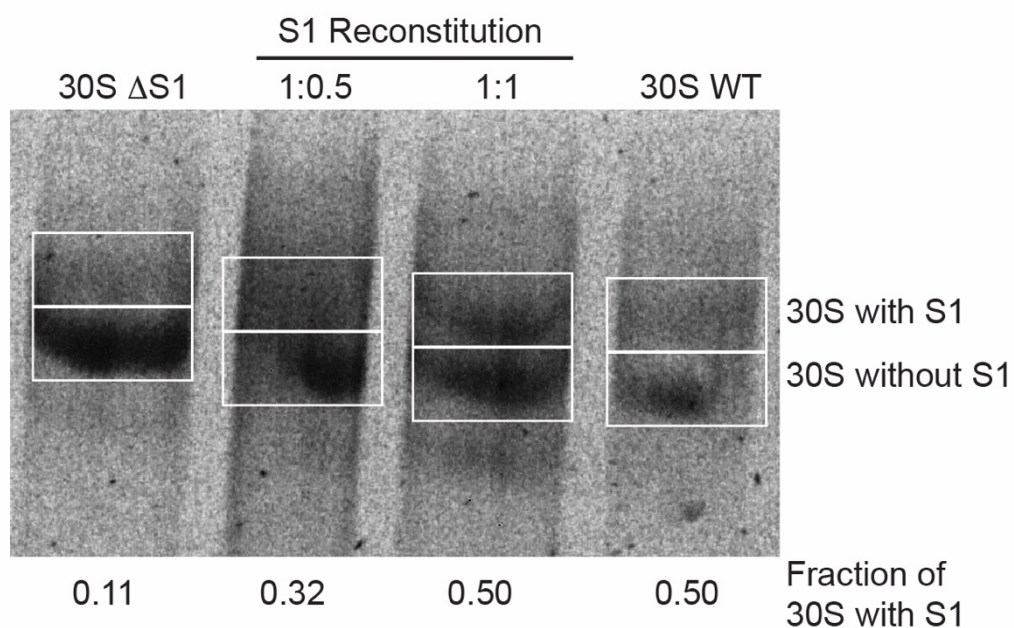

**Fig. S5. Assessment of the fraction of purified 30S that contains S1 using a composite non-denaturing 3% polyacrylamide:0.5% agarose gel.** 30S depleted of S1 (30S  $\Delta$ S1, first lane) shows only little (~11%) remaining S1. Addition of half-stoichiometric (second lane) and fully stoichiometric purified S1 (third lane) resulted in 32% and 50% reconstitution, respectively, into a slower moving band for 30S with S1 (top band). Our “wild-type” 30S preparation used for all experiments (30S WT, fourth lane) also shows two bands for the 30S with (top band) and without S1 (bottom band), with a similar 50% fraction in the top band as the stoichiometric reconstitution. The quantification areas are indicated.

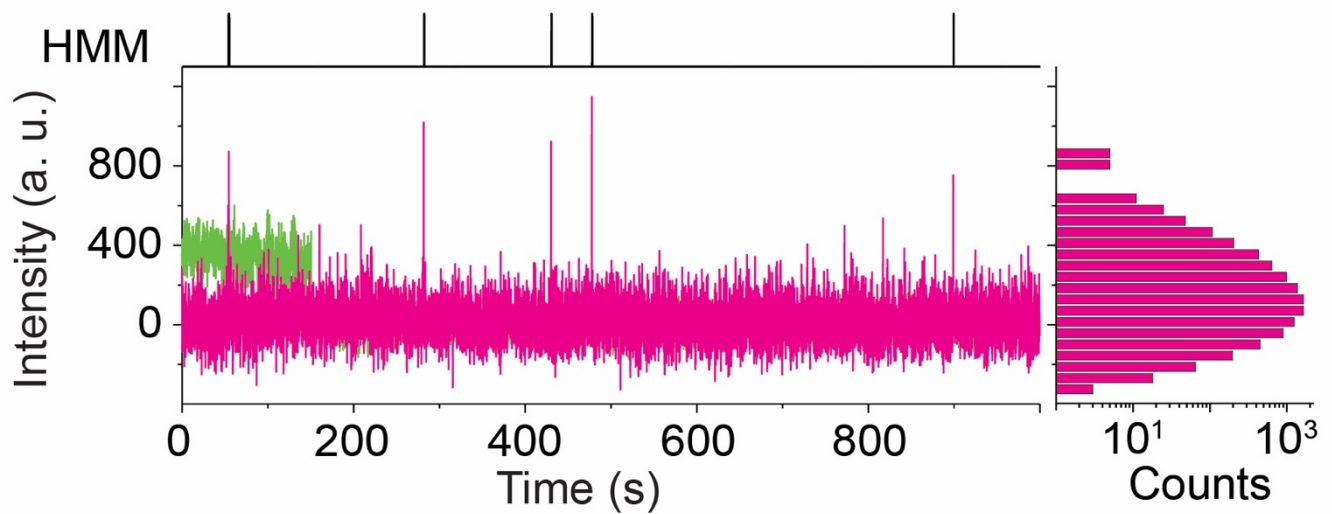

**Fig. S6. 30S binding to the nascent mRNA alone is less frequent compared to binding to the PEC-99 embedded mRNA.** Representative single-molecule time trace, HMM idealization (top panel) and Cy5 intensity histogram (right panel) showing less frequent 30S binding events to the corresponding mRNA alone compared to PEC-99 shown in Fig 2C.



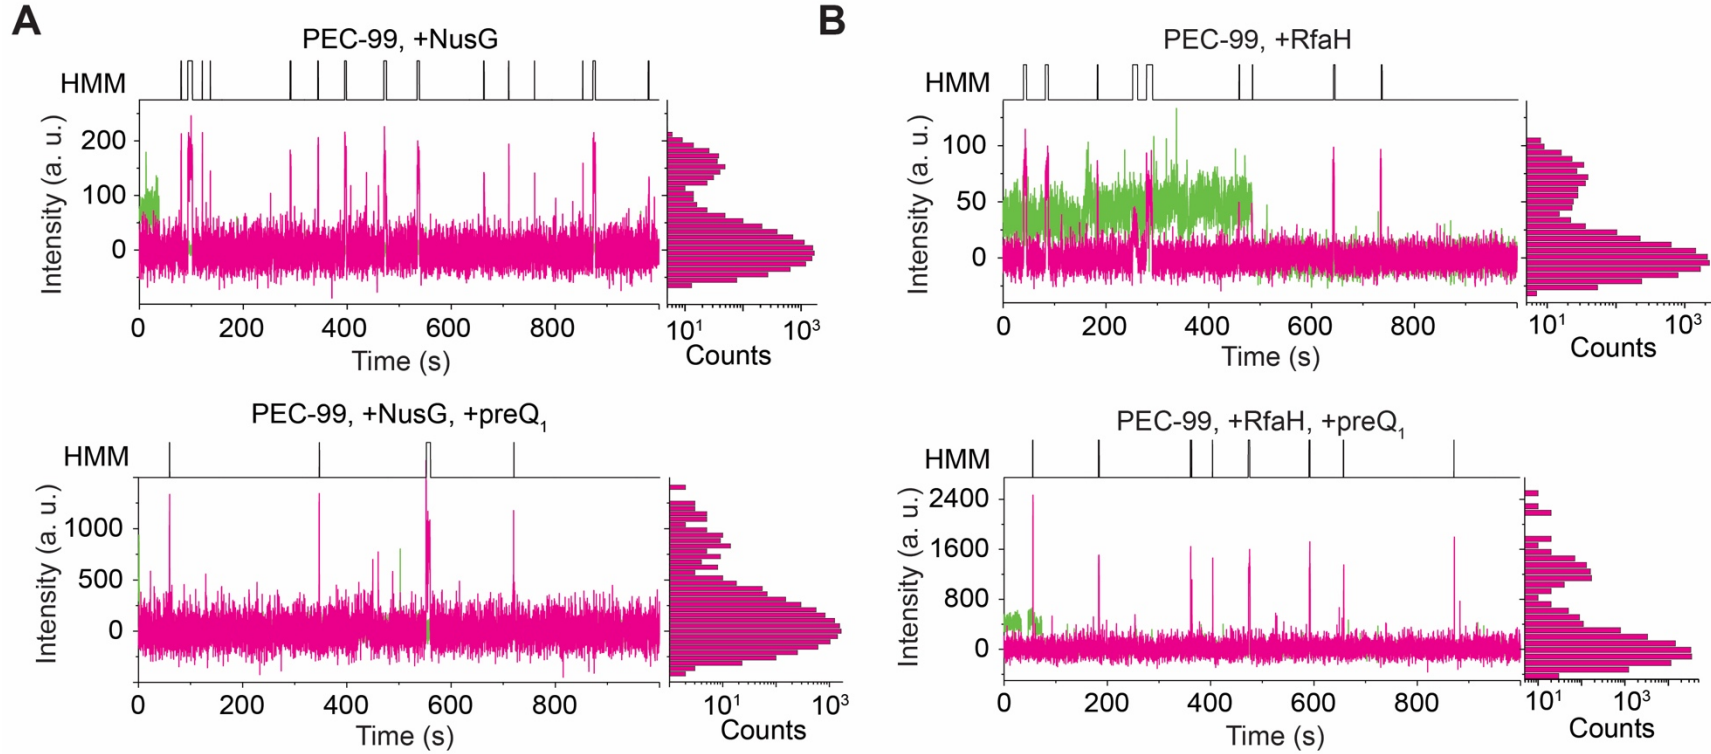

**Fig. S7. 30S binding to PEC-99 is assisted and stabilized by transcription factors NusG and RfaH, respectively.** (A) Representative single-molecule trajectories as in Fig. 2C,D (top and bottom, respectively), but in the presence of NusG. (B) Representative single-molecule trajectories as in Fig. 2C,D (top and bottom, respectively), but in the presence of RfaH.

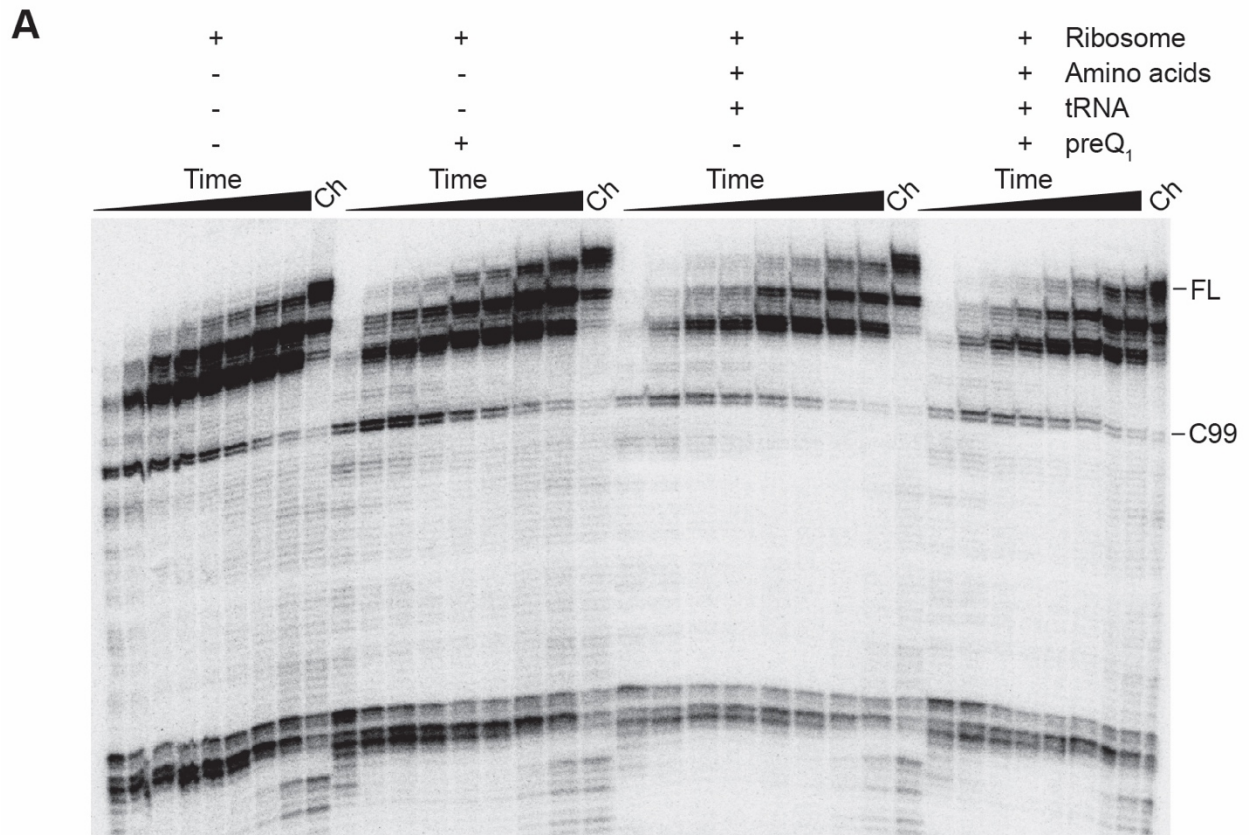

**Fig. S8. Effect of the 30S binding and translation on the C99 pause half-life.**  
 (A) *In vitro* transcription assay of *Bas* mRNA (as in Fig. 1D) in the absence and presence of preQ<sub>1</sub> under non-translating (-tRNA, -amino acids) and translating (+tRNA, + amino acids) ribosome conditions (conditions 2 and 3, respectively).

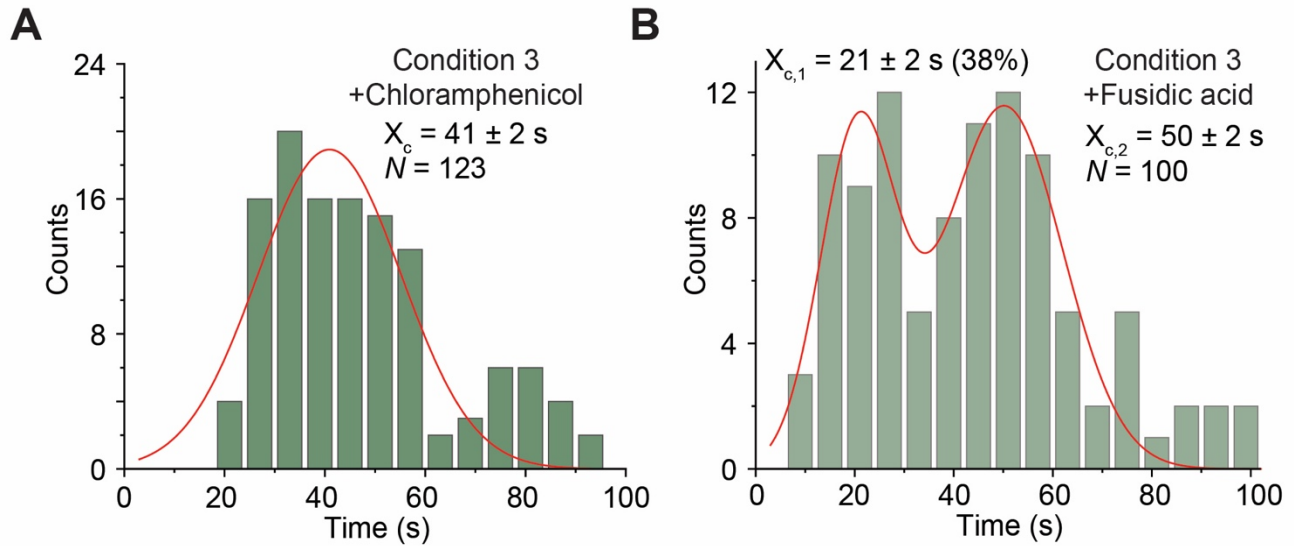

**Fig. S9. Monitoring transcription speed under translating ribosome conditions in the presence of translation inhibitors chloramphenicol and fusidic acid.** Histogram of transcription times constructed from  $N$  number of molecules for the translating condition (condition 3 in Fig. 4A) in the presence of translation inhibitors chloramphenicol (A) or fusidic acid (B).  $X_c$  represents the mean transcription time  $\pm$  standard deviation from the Gaussian fitting.

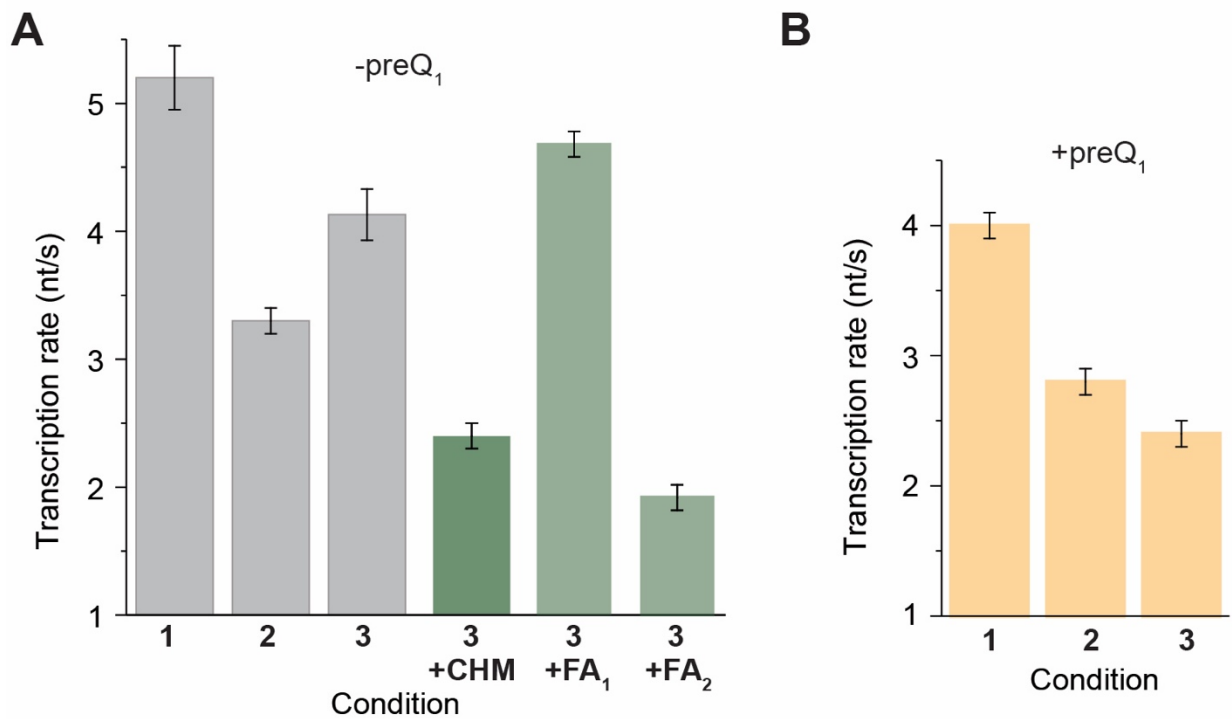

**Fig. S10. Monitoring transcription rates by real-time transcription assay.** (A) Changes in transcription rates for RNAP alone (condition 1 in Fig. 4A), and in the presence of ribosome under non-translating (condition 2 in Fig. 4A) and translating conditions (condition 3 in Fig. 4A) in the absence and presence of chloramphenicol (CHM) or fusidic acid (FA) as indicated. (B) Changes in transcription rates under conditions 1, 2, and 3 in the presence of preQ<sub>1</sub>.

| Condition                                      | $k_{\text{on}}$ ( $10^6 \text{ M}^{-1} \text{ s}^{-1}$ ) | $k_{\text{off}}$ ( $\text{s}^{-1}$ )         |
|------------------------------------------------|----------------------------------------------------------|----------------------------------------------|
| PEC-99 <sup>a</sup>                            | $3.4 \pm 0.4$                                            | $2.7 \pm 0.3$ (92%)<br>$0.2 \pm 0.05$ (8%)   |
| PEC-99 + preQ <sub>1</sub> <sup>a</sup>        | $1.8 \pm 0.3$                                            | $2.3 \pm 0.9$ (81%)<br>$0.2 \pm 0.2$ (19%)   |
| PEC-99 + blocking strand <sup>b</sup>          | $2.0 \pm 0.3$                                            | $2.7 \pm 0.3$ (93%)<br>$0.3 \pm 0.2$ (7%)    |
| mRNA alone <sup>b</sup>                        | $2.0 \pm 0.3$                                            | $3.3 \pm 0.3$ (95%)<br>$0.02 \pm 0.01$ (5%)  |
| mRNA alone + preQ <sub>1</sub> <sup>b</sup>    | $1.4 \pm 0.3$                                            | $3.2 \pm 0.5$ (88%)<br>$0.4 \pm 0.1$ (12%)   |
| PEC-99 + NusG <sup>a</sup>                     | $4.3 \pm 0.1$                                            | $2.4 \pm 0.03$ (88%)<br>$0.2 \pm 0.04$ (12%) |
| PEC-99 + NusG + preQ <sub>1</sub> <sup>a</sup> | $2.6 \pm 0.3$                                            | $1.8 \pm 0.2$ (85%)<br>$0.14 \pm 0.1$ (15%)  |
| PEC-99 + RfaH <sup>a</sup>                     | $3.4 \pm 0.2$                                            | $1.1 \pm 0.1$ (86%)<br>$0.04 \pm 0.01$ (14%) |
| PEC-99 + RfaH + preQ <sub>1</sub> <sup>a</sup> | $3.9 \pm 0.3$                                            | $1.4 \pm 0.2$ (86%)<br>$0.06 \pm 0.03$ (14%) |
| PEC-99 + IF mix <sup>a</sup>                   | $3.0 \pm 0.2$                                            | $2.0 \pm 0.1$ (88%)<br>$0.1 \pm 0.01$ (12%)  |

<sup>a</sup> Values represent the average  $\pm$  the standard error of the mean of three independent experiments.

<sup>b</sup> The reported error was estimated by bootstrapping using a custom MATLAB script.

**Table S1.** Kinetic parameters extracted from the single-molecule fluorescence co-localization experiments for 30S binding to PEC-99 and the corresponding nascent mRNA alone under different experimental conditions.

| Recombinant DNA | Source                       |
|-----------------|------------------------------|
| pKK3535         | Gift from Dr. Joseph Puglisi |
| BAS1509         | This study                   |

**Table S2.** List of plasmids used in this study.

| Oligonucleotides                                                                                                  | Source |
|-------------------------------------------------------------------------------------------------------------------|--------|
| T7A1- <i>Bas</i> _preQ <sub>1</sub> -Fwd2: TCCAGATCCCGAAAATTTATCAAAAAGAGT<br>ATTGACTTAAAGTCTAACCTATAGGATACTTACAGC | IDT    |
| <i>Bas</i> -preQ <sub>1</sub> -rev21cd: CATAGAAACAGCAATATATAATGCCGCTAA<br>AATACC                                  | IDT    |
| <i>Bas</i> -EC99: /5Biosg/TATAATGCCGCTAAAATACCATTACCGACT                                                          | IDT    |
| <i>Bas</i> -Tr99:<br>AGACCACGTTGAAAGATTGGGTTACGCTAAAATACCATTACCGACTAA<br>TGTTCTAATATTCAC                          | IDT    |
| Anchor_bio: /5Biosg/AGACCACGTTGAAAGATTGGGTTAC                                                                     | IDT    |
| Hp5extn_ribo_5Cy5_3Cy5: /5Cy5/AAAGGGAGATCAGGATATAAAG<br>/3Cy5Sp/                                                  | IDT    |
| <i>Bas</i> -109-Cy3rev: /5Cy3/ATATAATGCCGCTAAAATACCATTACCGACT                                                     | IDT    |
| <i>Bas</i> -blocking Strand: CTAATGTTCTAATATTCACGACAAAATCTCCTTAG                                                  | IDT    |

**Table S3.** Sequences for primers and oligonucleotides used in this study.

**Note S1.** Full-length *Bas* mRNA sequence for monitoring anti-SD probe binding:

ggguguugcuuaaaaaacgaauaacgugguucgaaaccaucccacguaaaaaacuaaggagauuuuguc  
GUGAAUAUUAGAACAUAUAGUCGGUAAUGGUUUUUAGCGGCAUUUAUAUUGCU  
GUUUCUAUGCUUAUUCAGCCAUUUGGCUUUACGAAUGUACAGUUUCGUUUUCA  
GAGAUGUUUAUCAUCUCGUUGUAUUUAAUAAGAAAGCAAUUUACGGAAUUGUA  
UUAGGUGUAUUUUUAACGAAUCUCUUUUUCACCUAUGAUUGCUUACGAUUUA  
GUUUUUGGAGUAGGGCAAUCUAUUCUUGCAUUAGUUGCAACCAUUUUUCUAUG  
CGAUUCAUUAAAGGUGUUUGGGCUCGUAUGAUUUUUAAUACAGUUUUCUUACA  
AUUACAAUGUUUAUGAUUGCAAUUGAACUUCUUGCAUUUGAUUUACCAUUU  
AUGUUGACUUGGUUAACAUGUGCAGUCGGUGAAUUUGUUGUCAUGGCCAUUGG  
UAUGCCUGUAAUGUACUGGAUUAAUAAACGAGUACAAUUUGAAAGAUUUUAUGUA  
Auagaugaaagagcuauuccuauagggauagcucuuuuuuuaagcu
